# Supplementary material for: Exercise improves muscle mitochondrial dysfunction-associated lipid profile under circadian rhythm disturbance
Source: PubMed Central journal article supplement — Korean J Physiol Pharmacol. 2024 Nov 1;28(6):515–26. doi: 10.4196/kjpp.2024.28.6.515 (PMC11519723; doi:10.4196/kjpp.2024.28.6.515), 2024-11-01
Supplement: kjpp-28-6-515-supple.pdf [file kjpp-28-6-515-supple.pdf]

**Supplementary Table 1. Multiple logistic regression for chronic diseases according to shift work**

| Variable     |     | Dyslipidemia        | Obesity             | Stroke              | MI or angina        | MI                  | Angina              | Arthritis           | Osteoarthritis      | RA                  | Thyroid disease     | Renal failure       | Depression          | Hypertension        | Diabetes mellitus   |
|--------------|-----|---------------------|---------------------|---------------------|---------------------|---------------------|---------------------|---------------------|---------------------|---------------------|---------------------|---------------------|---------------------|---------------------|---------------------|
| Shift worker | No  | Ref.                |
|              | Yes | 1.14<br>(1.01–1.28) | 1.03<br>(0.96–1.10) | 0.86<br>(0.64–1.16) | 0.92<br>(0.73–1.16) | 0.91<br>(0.60–1.36) | 0.89<br>(0.67–1.18) | 0.95<br>(0.84–1.07) | 0.97<br>(0.86–1.11) | 0.87<br>(0.66–1.16) | 1.03<br>(0.87–1.23) | 1.05<br>(0.63–1.77) | 0.88<br>(0.74–1.04) | 0.96<br>(0.89–1.04) | 0.99<br>(0.89–1.11) |

Adjusted by age, sex, total cholesterol, triglycerides, and high density lipoprotein cholesterol. Ref, reference; MI, myocardial infarction; RA, rheumatoid arthritis.

**Supplementary Table 2. Odds ratios of dyslipidemia according to physical activity in shift workers**

|                   | Physical activity |                  |
|-------------------|-------------------|------------------|
|                   | No                | Yes              |
| Total (N = 6,740) | 2,014 (29.88)     | 4,726 (70.12)    |
| Crude OR          | 1.00 (Ref)        | 0.92 (0.78–1.09) |
| Model 1           | 1.00 (Ref)        | 0.93 (0.78–1.11) |
| Model 2           | 1.00 (Ref)        | 0.94 (0.76–1.16) |

OR, odds ratios; Model 1, adjusted for age and sex; Model 2, Model 1 plus additionally adjusted for high total cholesterol, high triglycerides, and low high density lipoprotein cholesterol.

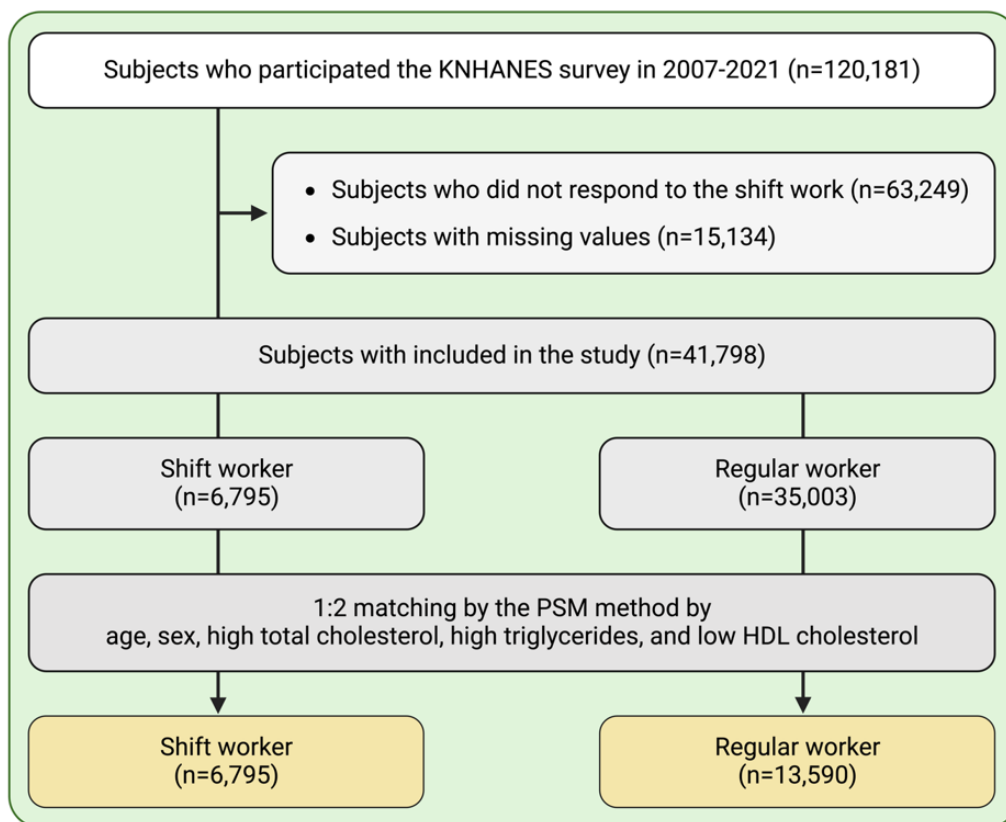

**Supplementary Fig. 1. Flow chart of study design.** Among 41,798 subjects who took part in this study, a final dataset of 6,795 individuals was chosen based on their shift work status after propensity score matching. KNHANES, Korea National Health and Nutrition Examination Survey; HDL, high density lipoprotein.

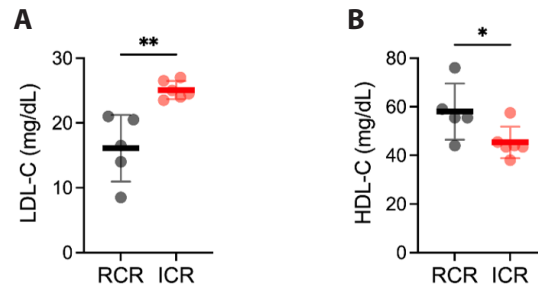

**Supplementary Fig. 2. Unpaired t-test results reveal significant increase in LDL levels and significant decrease in HDL-C levels in ICR compared to RCR group following 12 weeks circadian rhythm disturbance.** RCR, regular circadian rhythm; ICR, irregular circadian rhythm; LDL-C, low density lipoprotein cholesterol; HDL-C, high density lipoprotein cholesterol. \* $p < 0.05$ , \*\* $p < 0.01$  as determined using Student's t-test ( $n = 5-6$ ).
